# Supplementary material
Source: Springer Nature journal article supplement (https://www.springermedizin.de/resource/supplementary/12889_2007_1175_MOESM12_ESM.pdf/9502618)
Supplement: MOESM12 [file 9502618]

|      |        | Household and facility | Retail audit | Voucher tracking | Costing               | KII and FGDs |
|------|--------|------------------------|--------------|------------------|-----------------------|--------------|
| 2005 | Jan    |                        |              |                  |                       |              |
|      | Feb    |                        |              |                  |                       |              |
|      | March  |                        |              |                  |                       |              |
|      | April  | Preparations           | Fieldwork    |                  |                       |              |
|      | May    | ↓                      | ↓            |                  |                       |              |
|      | June   | Training               |              | Fieldwork        |                       |              |
|      | July   | Fieldwork              |              | ↓                |                       |              |
|      | August | ↓                      | ↓            |                  |                       |              |
|      | Sept   | Analysis               |              |                  |                       |              |
|      | Oct    |                        |              |                  |                       |              |
|      | Nov    | Prelim reporting       |              | ↓                |                       |              |
|      | Dec    |                        |              |                  |                       |              |
| 2006 | Jan    |                        | Reporting    | Analysis         |                       | Fieldwork    |
|      | Feb    |                        |              | ↓                |                       | ↓            |
|      | March  |                        |              |                  | Fieldwork             |              |
|      | April  | Preparations           | Fieldwork    | Reporting        | ↓                     |              |
|      | May    | ↓                      | ↓            |                  | Other data collection |              |
|      | June   | Training               |              |                  | ↓                     |              |
|      | July   | Fieldwork              |              |                  |                       |              |
|      | August | ↓                      |              |                  |                       | Reporting    |
|      | Sept   |                        |              |                  |                       |              |
|      | Oct    | Analysis               |              |                  | ↓                     | Fieldwork    |
|      | Nov    | Prelim reporting       |              | Fieldwork        | Reporting             |              |
|      | Dec    |                        | ↓            | ↓                |                       |              |
| 2007 | Jan    |                        |              |                  |                       |              |
|      | Feb    |                        |              |                  |                       |              |
|      | March  |                        |              |                  |                       |              |
|      | April  | Preparations           |              |                  |                       |              |
|      | May    | ↓                      |              | ↓                |                       |              |
|      | June   | Training               |              | Analysis         |                       |              |
|      | July   | Fieldwork              |              | ↓                |                       |              |
|      | August | ↓                      | Reporting    | Reporting        |                       |              |
|      | Sept   |                        |              |                  |                       |              |
|      | Oct    | Analysis               |              |                  |                       |              |
|      | Nov    | Prelim reporting       |              |                  |                       |              |
|      | Dec    |                        |              |                  |                       |              |
